# Supplementary material
Source: PubMed Central journal article supplement (PMC4969180)

# Adsorption of benzoxaboroles on hydroxyapatite phases

Marie-Alix Pizzoccaro, Ondrej Nikel, Saad Sene, Coralie Philippe, P. Hubert Mutin,

Sylvie Bégu, Deepak Vashishth and Danielle Laurencin

## SUPPORTING INFORMATION

| Content                                                                                                                                                                                                                                 | Page |
|-----------------------------------------------------------------------------------------------------------------------------------------------------------------------------------------------------------------------------------------|------|
| SEM, TEM and powder-X-ray diffraction characterizations of the HA <sub>ceram</sub> and HA <sub>nano</sub> phases (Figure S1).                                                                                                           | S2   |
| Synthesis of Ca(C <sub>7</sub> H <sub>6</sub> BO(OH) <sub>2</sub> ) <sub>2</sub> .2H <sub>2</sub> O (CaBBzx.2H <sub>2</sub> O), and characterization of the material using SEM, XRD, IR and <sup>11</sup> B solid state NMR (FigureS2). | S3   |
| <sup>11</sup> B { <sup>31</sup> P} DFS-REDOR NMR sequence : explanation of the sequence and of how it allows <sup>11</sup> B... <sup>31</sup> P proximities to be probed (Figure S3).                                                   | S4   |
| Grafting of BBzx onto HA <sub>ceram</sub> : kinetics and isotherm (T = 22°C) (Figure S4).                                                                                                                                               | S5   |
| Variations in Ca and P supernatant concentrations as a function of grafting time and BBzx concentration in solution (Figure S5).                                                                                                        | S6   |
| Kinetics of grafting of benzoate (PhC) and phenylphosphate (PhP) onto HA <sub>ceram</sub> (Figure S6)                                                                                                                                   | S7   |
| XRD powder patterns of bis-pipe-BBzx grafted HA <sub>ceram</sub> and of an HA phase grafted “ <i>in situ</i> ” (during precipitation) by bis-pipe-BBzx (Figure S7)                                                                      | S7   |
| <sup>11</sup> B MAS NMR of a material obtained by “ <i>in-situ</i> ” grafting of BBzx on HA, in comparison to a borate-grafted HA phase obtained under similar conditions (Figure S8).                                                  | S8   |
| <sup>11</sup> B MAS NMR of a BBzx-grafted HA <sub>ceram</sub> phase, after 36 months of storage at room temperature (Figure S9).                                                                                                        | S8   |

**Figure S1.** SEM, TEM and powder-X-ray diffraction characterizations of the HA<sub>ceram</sub> and HA<sub>nano</sub>.

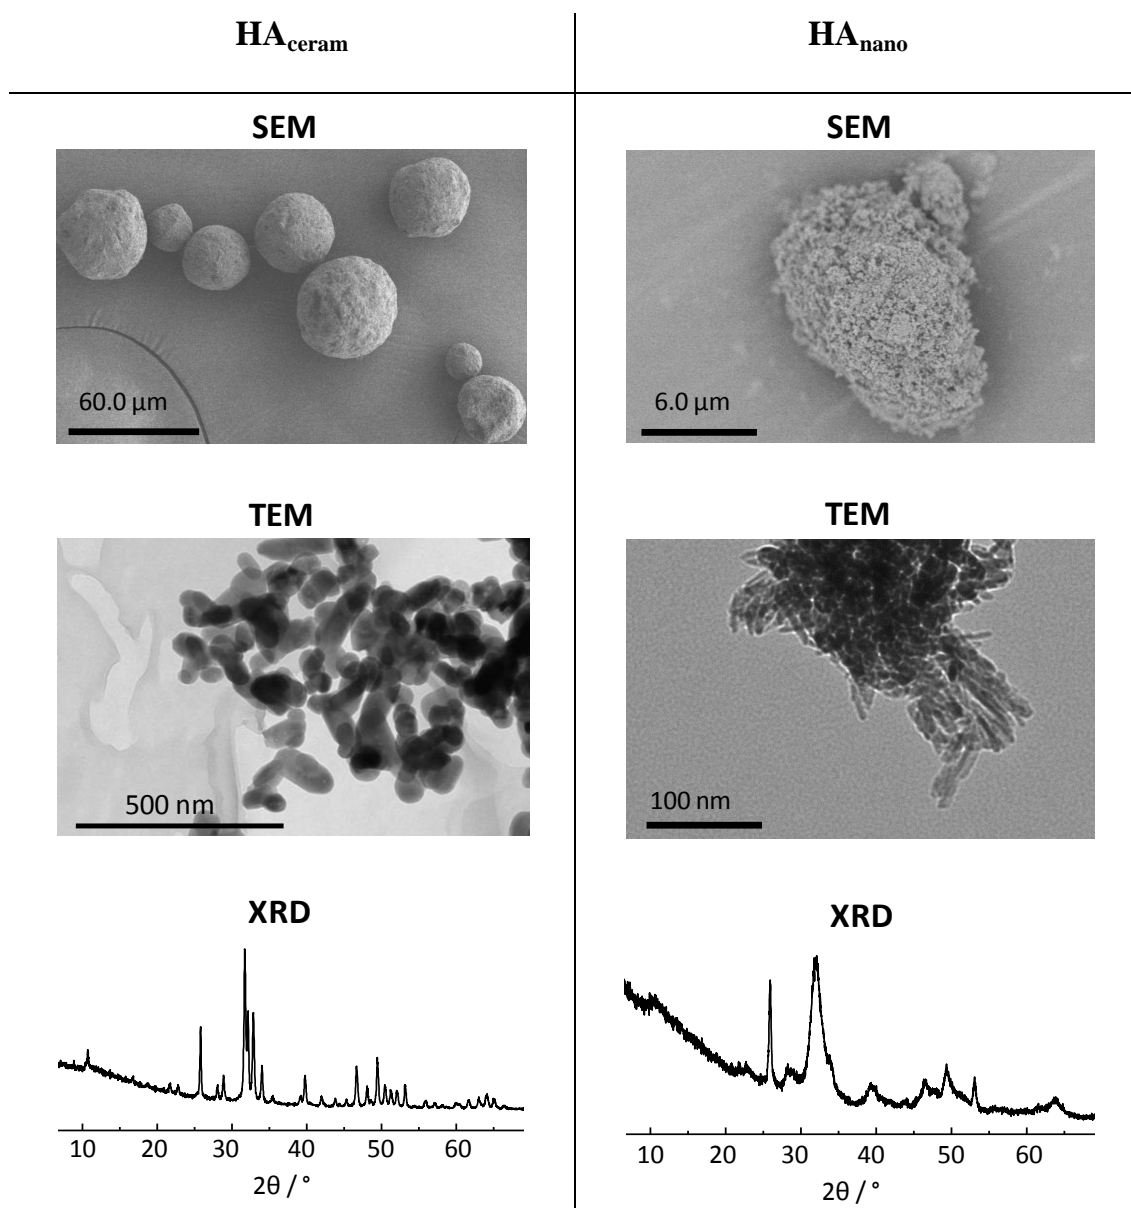

## Synthesis of $\text{Ca}(\text{C}_7\text{H}_6\text{BO}(\text{OH})_2)_2 \cdot 2\text{H}_2\text{O}$ ( $\text{CaBBzx} \cdot 2\text{H}_2\text{O}$ )

Microbeads of NaOH (100.2 mg, 2.5 mmol) of NaOH were dissolved in 7 mL of ultrapure  $\text{H}_2\text{O}$ , followed by 322.0 mg of BBzx (2.4 mmol). The benzoxaborate anions were then precipitated by progressive addition of 1.5 mL of an aqueous solution of  $\text{CaCl}_2$  (0.8 mol.L<sup>-1</sup> solution, 1.2 mmol, 0.5 eq). The mixture was stirred for 1 hour at room temperature, during which the progressive formation of a white precipitate was observed. The suspension was filtered and then washed twice with 3 mL  $\text{H}_2\text{O}$  and twice with 3 mL  $\text{Et}_2\text{O}$ . The white powder was then dried for 48 h at 60°C (m = 99 mg,  $\eta$  = 22%). Elemental analysis calculated (%) for  $\text{Ca}(\text{C}_7\text{H}_6\text{BO}(\text{OH})_2)_2 \cdot 2\text{H}_2\text{O}$ : C 44.5, H 5.3, Ca 10.6, B 5.7; found: C 45.0, H 5.2, Ca 10.5, B 5.6.

$\text{CaBBzx} \cdot 2\text{H}_2\text{O}$  could also be synthesized using a 1/1  $\text{H}_2\text{O}/\text{EtOH}$  mixture instead of  $\text{H}_2\text{O}$  only. In this case, in a typical synthesis, 96.2 mg (2.4 mmol) of NaOH microbeads were dissolved in 7 mL of an  $\text{H}_2\text{O}/\text{EtOH}$  1/1 mixture, before adding 321.5 mg of BBzx (2.4 mmol). Once the benzoxaborole dissolved, 1.5 mL of an aqueous solution of  $\text{CaCl}_2$  (0.8 mol.L<sup>-1</sup> solution, 1.2 mmol) were added drop by drop, leading to the immediate formation of a white precipitate. The suspension was stirred for 30 minutes at room temperature, and then filtered under vacuum on a fritted glass filter glass-frit. The precipitate was washed twice with 5 mL of the  $\text{EtOH}/\text{H}_2\text{O}$  mixture and twice with 5 mL of  $\text{Et}_2\text{O}$ . The white powder was then dried at 40 °C for 28 h (m = 298 mg,  $\eta$  = 66%). Elemental analysis calculated (%) for  $\text{Ca}(\text{C}_7\text{H}_6\text{BO}(\text{OH})_2)_2 \cdot 2\text{H}_2\text{O}$ : C 44.5, H 5.3, Ca 10.6, B 5.7; found: C 43.2, H 4.9, Ca 11.4, B 5.6.

**Figure S2.** SEM, XRD, IR and <sup>11</sup>B solid state NMR characterizations of  $\text{CaBBzx} \cdot 2\text{H}_2\text{O}$ .

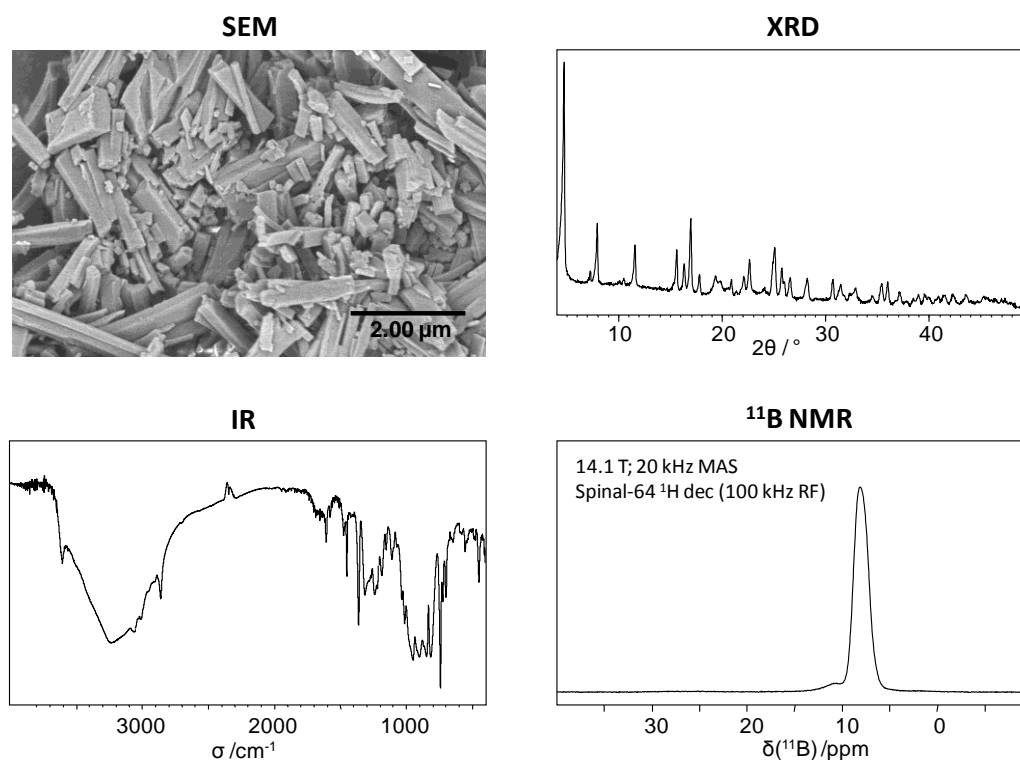

**Figure S3.** Schematic representation of the  $^{11}\text{B}\{^{31}\text{P}\}$  DFS-REDOR NMR sequence used (a), and how the comparison of spectra acquired with (S) and without ( $S_0$ ) the  $^{31}\text{P}$   $\pi$  pulses allows probing  $^{11}\text{B}$ - $^{31}\text{P}$  proximities (b).

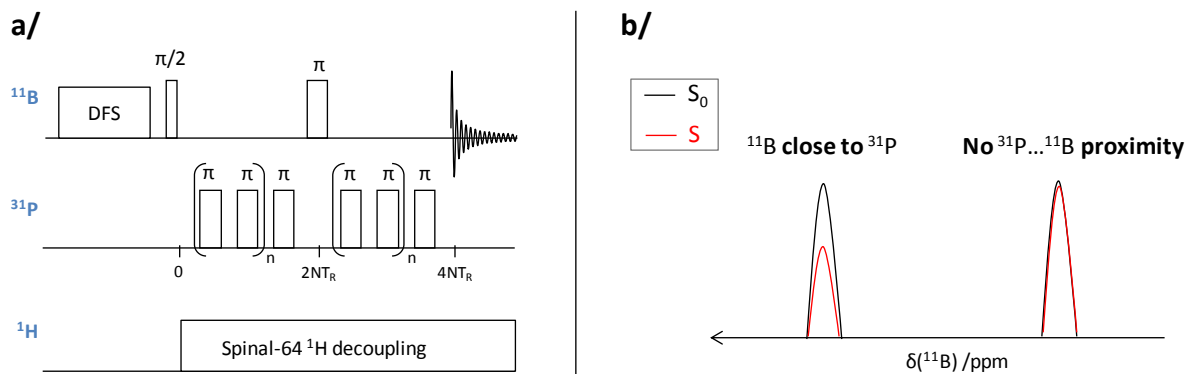

The  $^{11}\text{B}\{^{31}\text{P}\}$  REDOR NMR pulse sequence allows the study of  $^{11}\text{B}$ - $^{31}\text{P}$  through space proximities. With  $^{11}\text{B}\{^{31}\text{P}\}$  REDOR, two  $^{11}\text{B}$  NMR spectra are acquired and compared: one corresponds to a normal “spin echo”  $^{11}\text{B}$  NMR spectrum ( $S_0$ ), while the other has additional  $^{31}\text{P}$  recoupling  $\pi$  pulses (S). The series of rotor-synchronized  $\pi$  pulses on  $^{31}\text{P}$  allows reintroducing dipolar coupling to nearby boron atoms, causing them to “dephase” and their signal to decrease in intensity. By comparison of spectra acquired with and without the  $^{31}\text{P}$  recoupling pulses, identification of  $^{11}\text{B}$ - $^{31}\text{P}$  proximities is possible.

**Figure S4.** Grafting of BBzx onto HA<sub>ceram</sub>: kinetics (a) and isotherm (T = 22°C) (b).

For the grafting kinetics, the study was performed using a concentration of  $\sim 17 \text{ mmol.L}^{-1}$  of BBzx in solution. For the isotherm, the grafting time was set to 6 h for each point. Error bars correspond to standard deviations over 2 to 5 independent repetitions of each experiment.

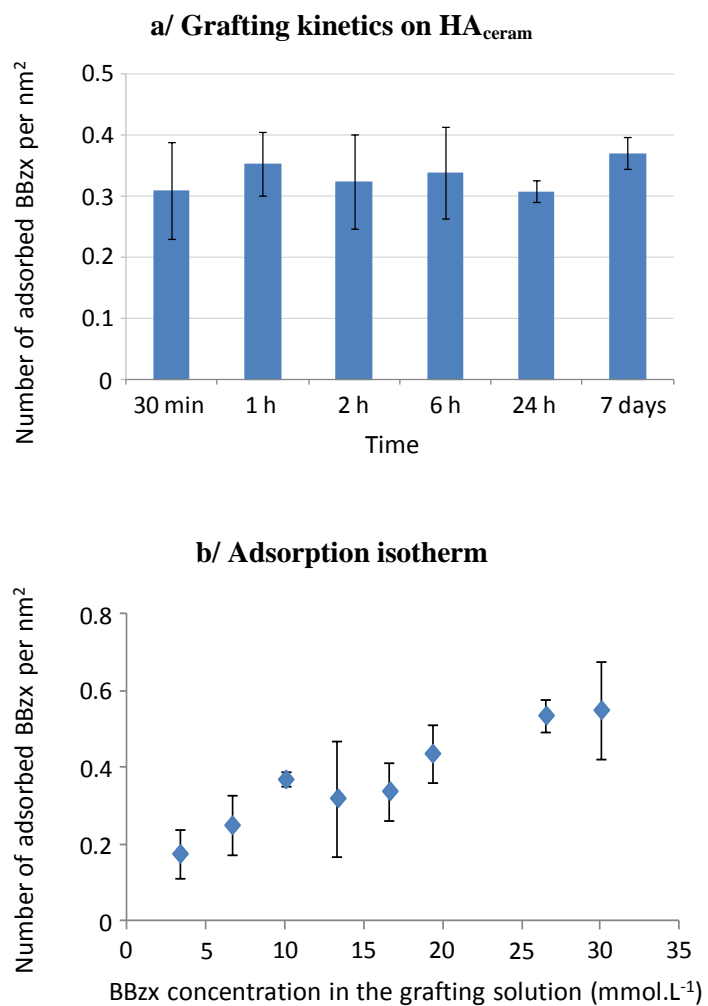

**Figure S5.** Variations in Ca and P supernatant concentrations as a function of grafting time (a) and BBzx concentration in solution (b).

The grafting was performed using a concentration of  $\sim 17 \text{ mmol.L}^{-1}$  of BBzx in solution, and a reaction time of 6 hours. Error bars correspond to standard deviations over 2 to 5 independent repetitions of each experiment.

a/

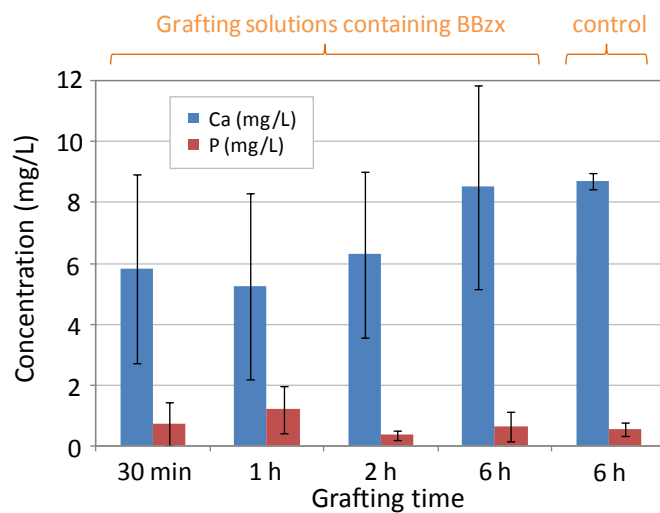

b/

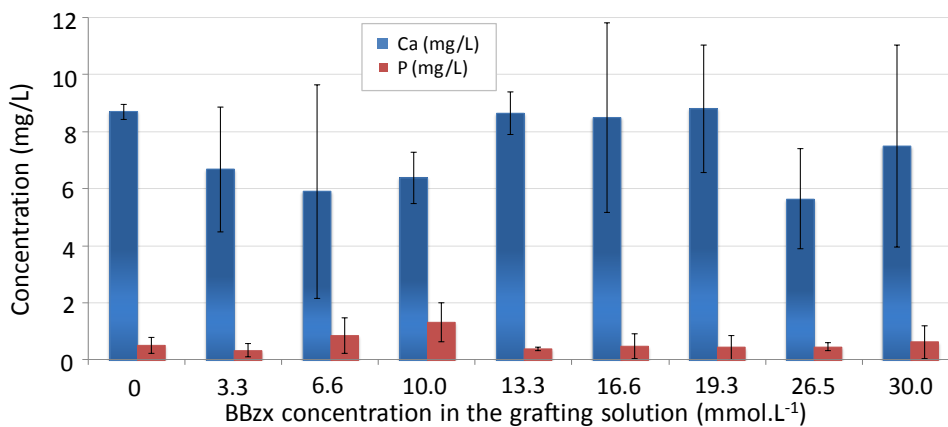

**Figure S6.** Kinetics of grafting of benzoate (PhC) and phenylphosphate (PhP) onto HA<sub>ceram</sub>. Grafting densities were determined here by integration of <sup>1</sup>H solid state NMR spectra.

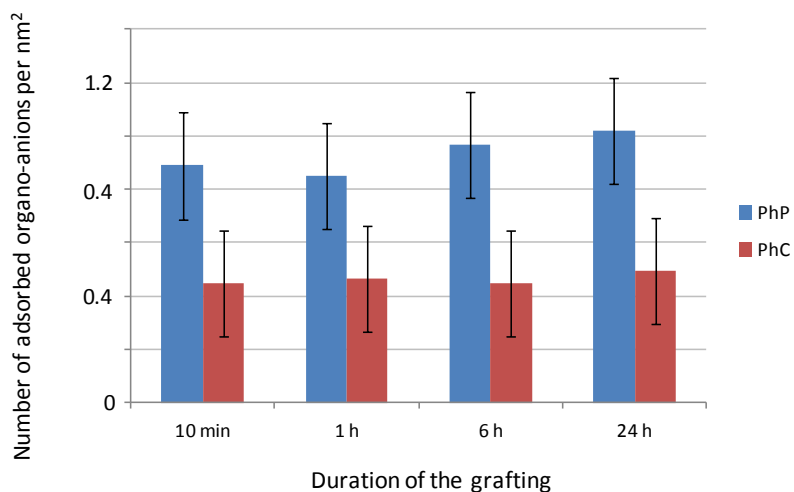

**Figure S7.** XRD powder patterns of bis-pipe-BBzx grafted HA<sub>ceram</sub> (a) and of an HA phase grafted “*in situ*” (during precipitation) by bis-pipe-BBzx (b).

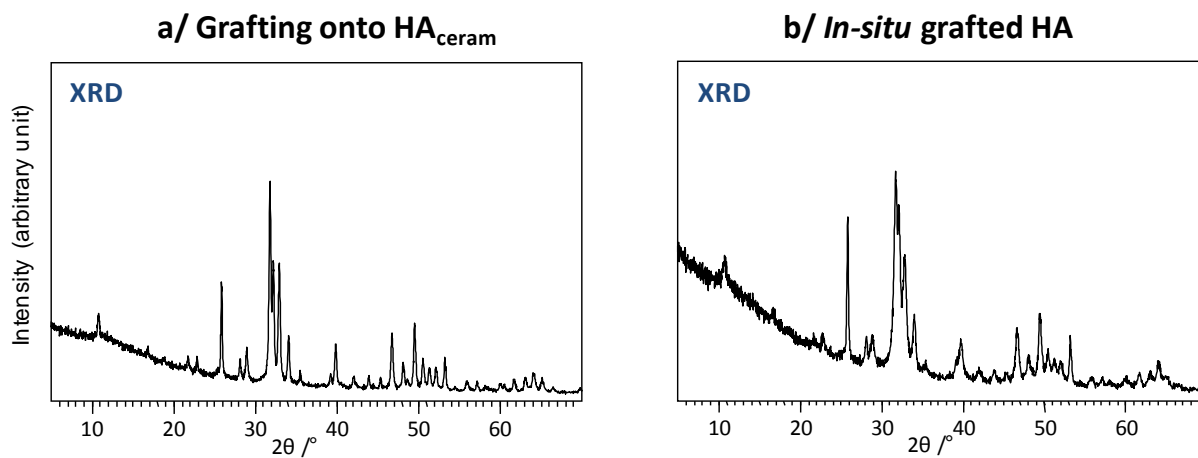

**Figure S8.**  $^{11}\text{B}$  MAS NMR of a material obtained by “*in-situ*” grafting of BBzx on HA, in comparison to a borate-grafted HA phase prepared under similar conditions.

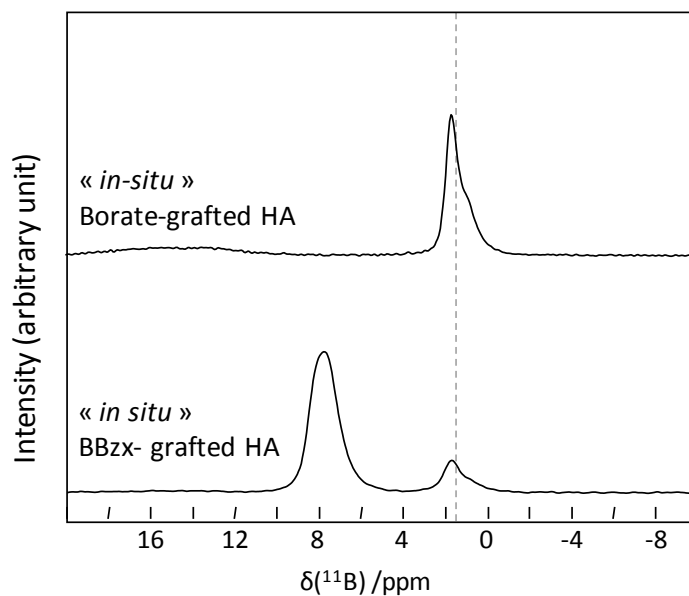

**Figure S9.**  $^{11}\text{B}$  MAS NMR of a BBzx-grafted  $\text{HA}_{\text{ceram}}$  phase, after 36 months of storage at room temperature. A new resonance starts to appear at low frequencies, which could correspond to borates.

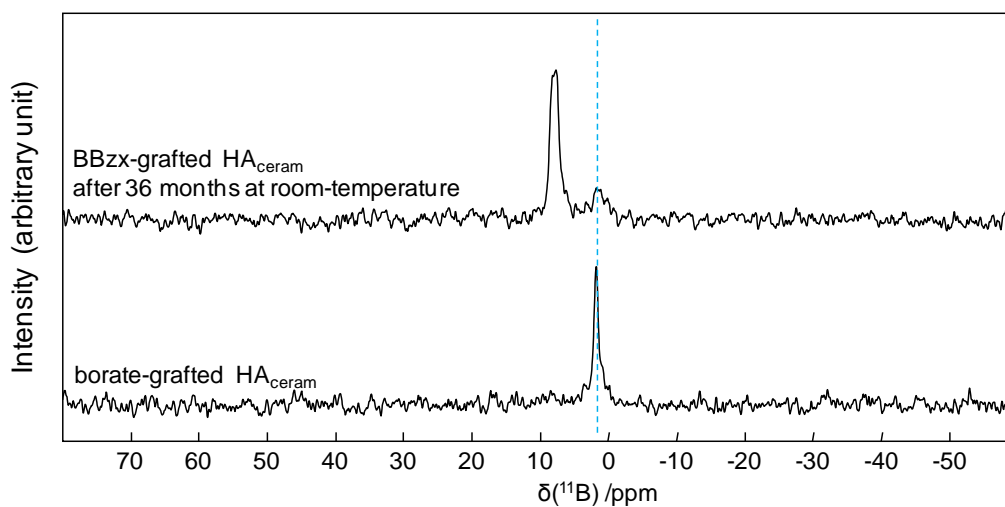

Supplement: NIHMS795788-supplement.pdf [file NIHMS795788-supplement.pdf]
